# Supplementary material for: First principles calculations on oxygen vacant hydrated α-MnO2 for activating water oxidation and its self-healing mechanism
Source: Royal Society of Chemistry journal article supplement (doi:10.1039/c6cp02032a), 2016-01-01
Supplement: c6cp02032a1.pdf [file c6cp02032a1.pdf]

## Supporting Information

### First principles calculations on oxygen vacant hydrated $\alpha$ -MnO<sub>2</sub> for activating water oxidation and self-healing mechanism

Kruthika Ganesan<sup>a,b</sup> and P. Murugan<sup>a,b\*</sup>

<sup>a</sup>Functional Materials Division, CSIR-Central Electrochemical Research Institute (CECRI),

Karaikudi-630 003, Tamil Nadu, India.

<sup>b</sup>Academy of Scientific & Innovative Research, CECRI, India.

\*E-mail: murugan@cecri.res.in.

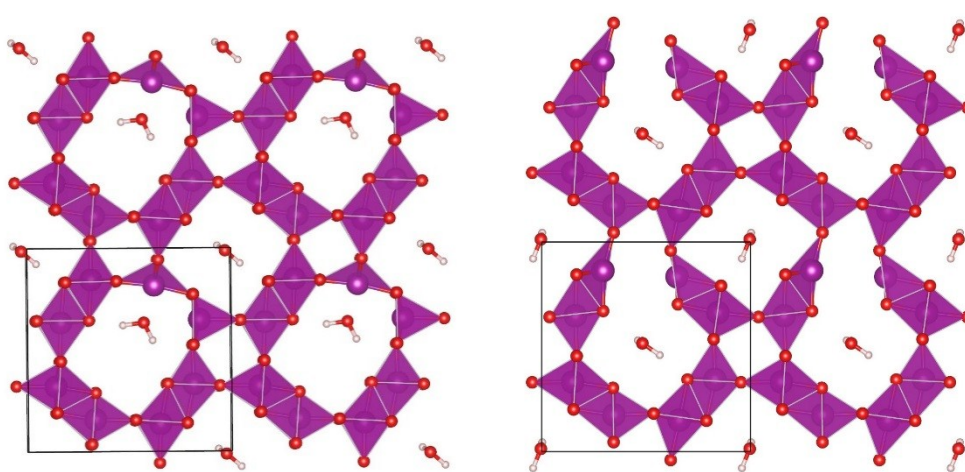

Figure S1: The polyhedral model of optimized structures (z-axis view) of  $\alpha$ -MnO<sub>2</sub> compound with oxygen vacancy at pyramidal (left side) and planar sites (right side). Red, magenta, and pale white coloured balls represent O, Mn, and H atoms, respectively. Boundary of unit cell is also marked by black line.

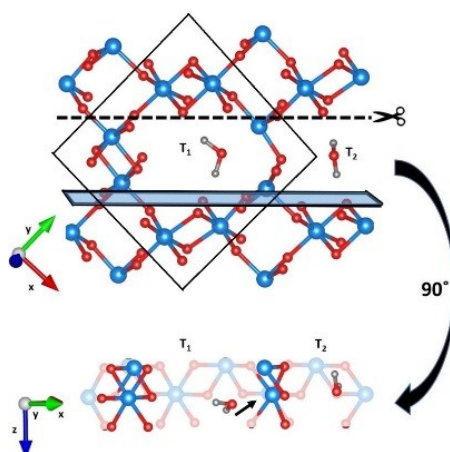

Figure S2: Optimized crystal structure of ISC (top panel) and cross sectional view (bottom panel), in which water molecule occupied at oxygen vacant site. Red, blue, and pale white coloured ball corresponds to O, Mn, and H atoms, respectively. Boundary of unit cell is also marked by black line.

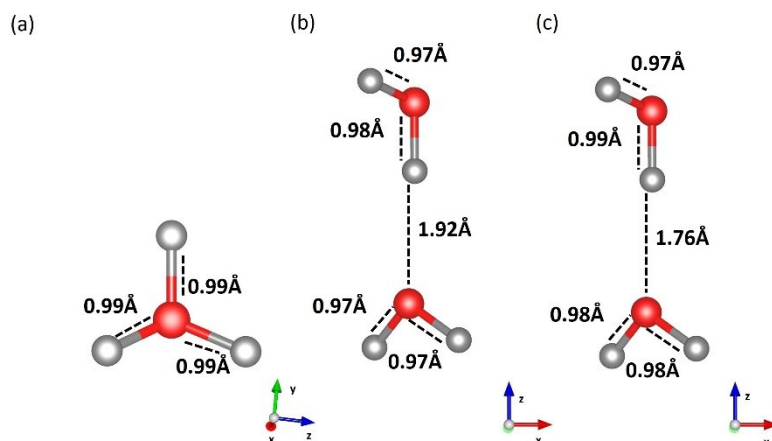

Figure S3: Optimized geometry of various protonic moieties are given along with bond distances, (a) hydronium ion, (b) water dimer in isolated case, and (c) water dimer presented in  $T_2$  of  $\alpha\text{-MnO}_{2-\delta}$ . Red and light grey balls represent O and H atoms, respectively.

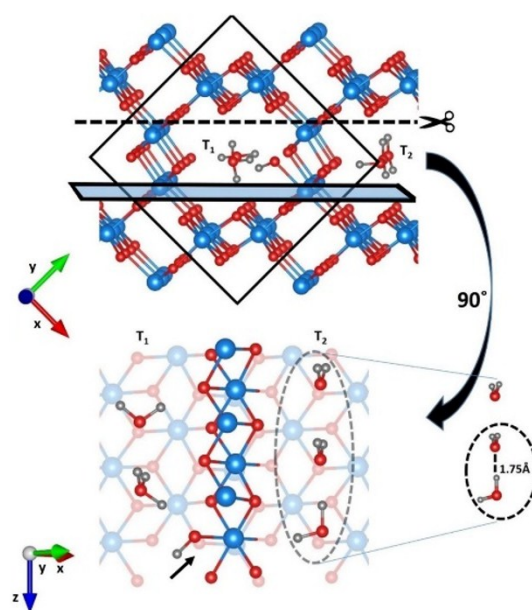

Figure S4: Optimized crystal structure of 3SC (top panel) and its cross sectional view (bottom panel), in which, hydroxide ion (indicated by arrow), Zundel cation at  $T_1$  and water dimer at  $T_2$  are shown. Red, blue, and pale white coloured ball corresponds to O, Mn, and H atoms, respectively. Boundary of unit cell is also marked by black line.

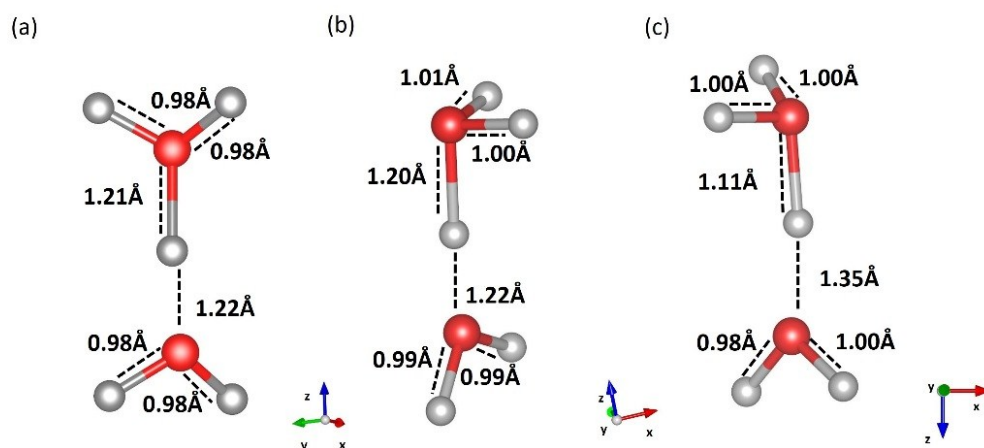

Figure S5: Optimized geometry of (a) Zundel cation presented in isolated case, (b) inside of  $T_1$  in 3SC, and (c) 4SC, are shown along with various bond distances. Red and light grey balls represent O and H atoms, respectively.

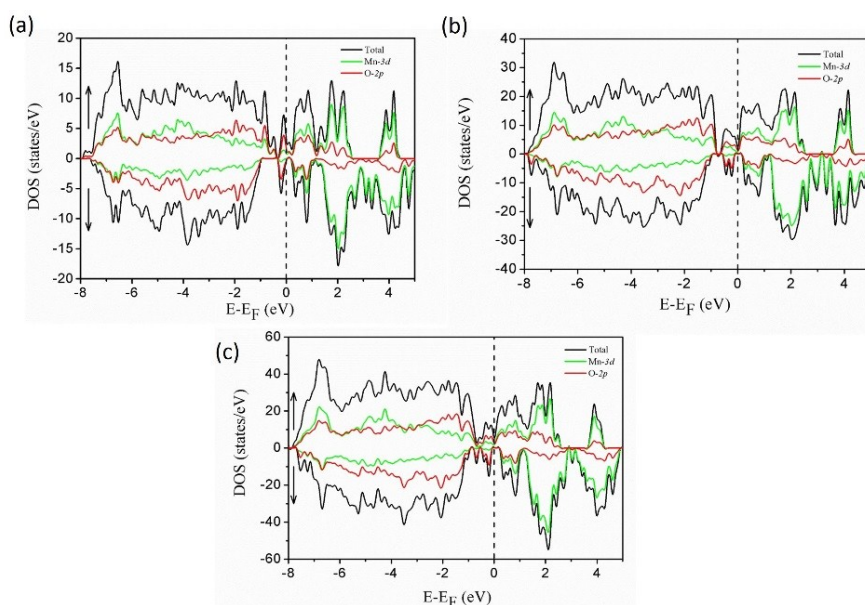

Figure.S6. Total and partial DOS of ferromagnetically aligned (a) 1SC, (b) 2SC, and (c) 3SC system. In 1SC, the states near the Fermi level ( $E_F$ ) are quite sharper, as compared to other two systems, because the proton moieties are presented in latter two cases.

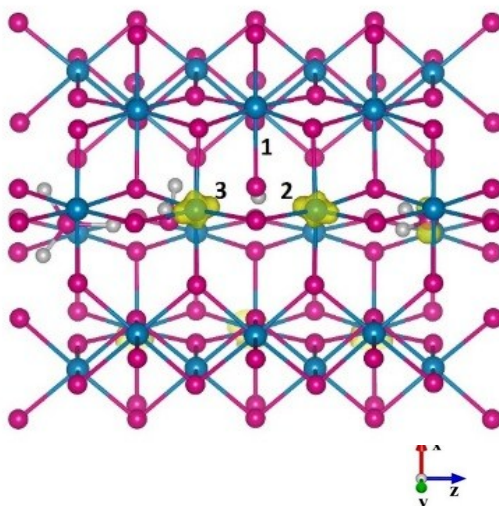

Figure S7: Partial charge density distribution of the states that lie in the energy range of -0.7 to 0.0 eV are shown for 4SC with water molecules in the tunnel. Three Mn atoms, nearer to vacancy are marked as 1, 2, and 3.

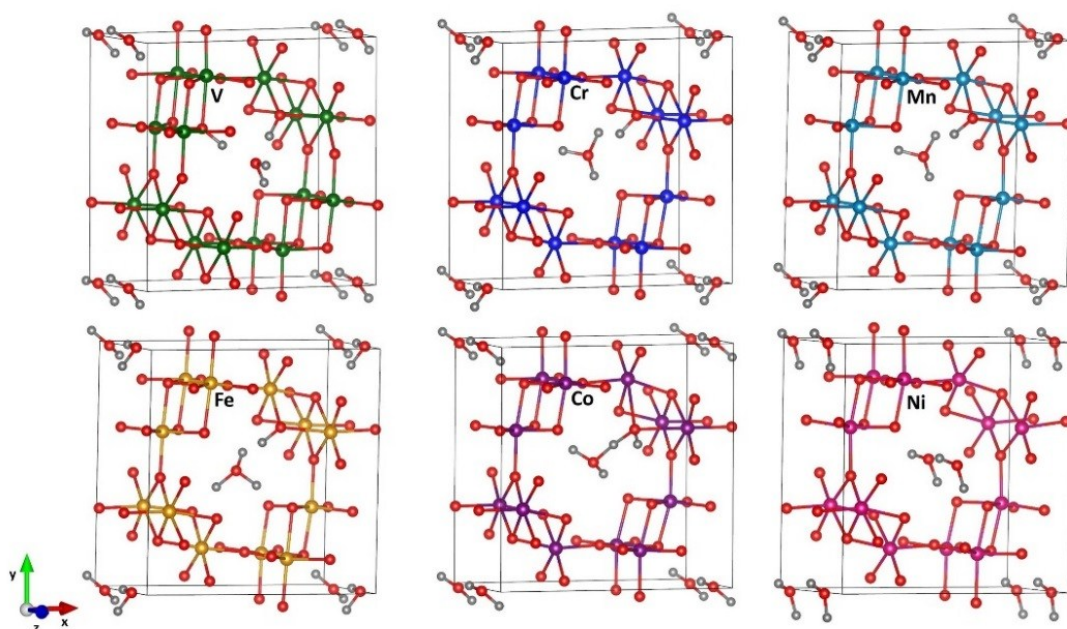

Figure S8: The reactivity towards water molecule for hypothetical compounds formed by the replacement of transition metal atoms ( $M = V, Cr, Fe, Co, Ni$ ) instead of Mn atoms in  $\alpha\text{-MnO}_{2-\delta} 0.25 \text{H}_2\text{O}$ .

Our calculations show that the  $\text{VO}_2$  is observed to behave as an amphoteric oxide, which act as an acid by adsorbing hydroxide ion near the oxygen vacancy as well as base by protonation of lattice oxygen. The compounds, such as  $\text{CrO}_2$  and  $\text{FeO}_2$ , adsorb the hydroxide ion with its moderate bond strength and the hydronium ion is formed in  $T_1$ , as similar to hydrated  $\text{MnO}_2$  compound. On the other hand, the  $\text{CoO}_2$  compound just attracts the water molecule, but it cannot able to dissociate it. While  $\text{NiO}_2$  cannot afford the lattice energy nor to dissociate or absorb the water molecule. Water dimer is also observed in the adjacent tunnel  $T_2$  of all compounds except Ni case.

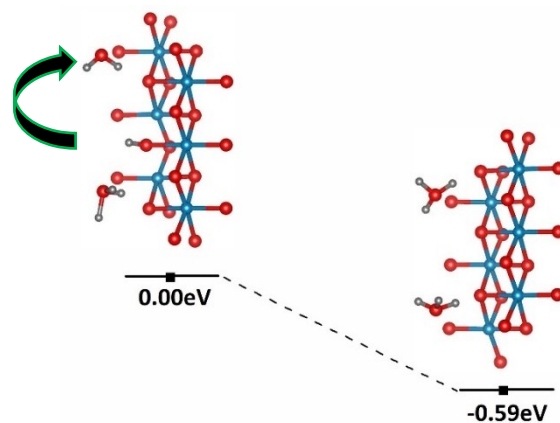

Figure S9: Self-healing nature is demonstrated in 3SC. In which, self-healed system is more stable by 0.59 eV, with respect to another. These two hydronium ions can be exchanged with  $\text{Li}^+$  ions. The arrow indicates the destination of proton in the next conformation.

Table S1: The bond lengths of hydrogen bonded network inside the tunnel structure responsible for proton diffusion.

| Parameters             | Step 1 (Å)       | Parameters             | Step 2 (Å)       | Parameters                  | Step 3 (Å)       | Parameters                  | Step 4 (Å)       |
|------------------------|------------------|------------------------|------------------|-----------------------------|------------------|-----------------------------|------------------|
| O-H in hydroxide       | 0.98             | O-H in hydronium1      | 1.00, 1.00, 1.09 | O-H in water                | 0.98, 0.99       | O-H in hydronium1           | 1.00, 1.01, 1.11 |
| O-H in water1          | 1.00, 0.98       | O-H in water           | 0.98, 0.98       | O-H in hydronium1           | 1.00, 1.13, 0.98 | O-H in hydronium2           | 0.99, 0.98, 1.14 |
| O-H in hydronium       | 1.00, 1.11, 1.00 | O-H in hydronium2      | 1.15, 0.99, 0.99 | O-H in hydronium2           | 1.04, 1.05, 0.99 | O-H in water                | 0.98, 0.98       |
| O(hydroxide)-O(water1) | 2.49             | O(hydronium1)-O(water) | 3.75             | O(water)-H(hydronium2)      | 1.32             | O(hydronium1)-O(hydronium2) | 3.61             |
| O(water1)-H(hydronium) | 1.35             | O(water)-H(hydronium)  | 1.31             | O(hydronium1)-O(hydronium2) | 3.98             | H(hydronium2)-O(water)      | 1.32             |
| O(hydronium)-O(water2) | 2.69             | -                      | -                | -                           | -                | -                           | -                |
| O-H in water2          | 0.98, 0.98       | -                      | -                | -                           | -                | -                           | -                |



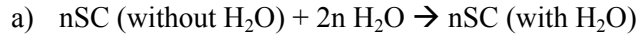

where  $n = 1, 2, 3$ , and  $4$ .

$$\Delta E (\text{product} - \text{reactant}) = -1.15 \text{ eV } (n = 1), -2.13 \text{ eV } (n = 2), -2.18 \text{ eV } (n = 3), -2.25 \text{ eV } (n = 4)$$

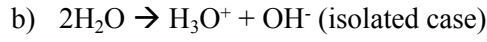

$$\Delta E (\text{product} - \text{reactant}) = 7.47 \text{ eV}$$

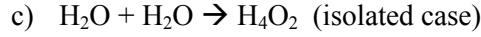

$$\Delta E (\text{product} - \text{reactant}) = -0.23 \text{ eV}$$

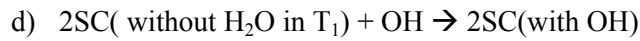

$$\Delta E (\text{product} - \text{reactant}) = -3.71 \text{ eV}$$

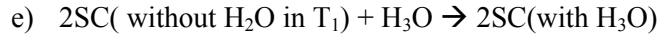

$$\Delta E (\text{product} - \text{reactant}) = -4.90 \text{ eV}$$

Scheme: The chemical reactions with corresponding reaction energies are shown. (a) Energy gain due to adsorption of water molecules (b) dissociation of water molecules in isolated case (c) water dimer formation in isolated case (d) adsorption of hydroxide in the  $\text{MnO}_2$  network (e) intercalation of hydronium in the  $\text{MnO}_2$  network.

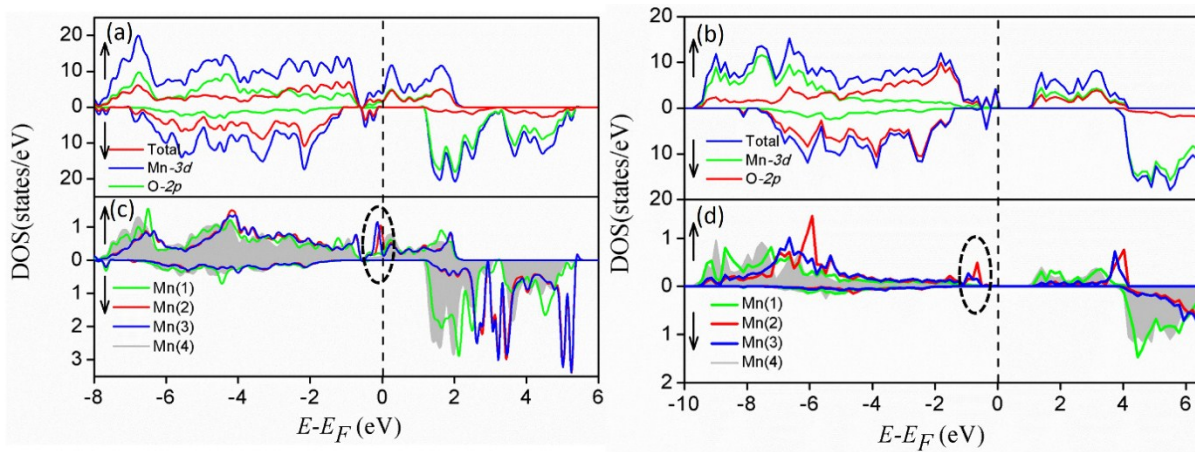

Figure S10 : Total and Partial DOS of FM aligned 2SC of hydrated oxygen vacant  $\alpha\text{-MnO}_2$  (a) GGA+U (b) HSE06+U functionals, Site decomposed DOS of 3d states of three Mn atoms (green, red, blue) nearby oxygen vacant site are shown along with bulk Mn atom (grey shade) (c) GGA+U (d) HSE06+U functionals. Up and down arrows refer atoms with up and down spins respectively.

From the above figure, the features of the DOS calculated using both GGA+U and HSE06+U functionals are found to be almost similar except the energy position of valence and conduction band. As generally expected, the HSE06 hybrid functional significantly overestimated the band gap and it is 0.95 eV. In the site decomposed DOS calculated using both functionals, the dotted circle below Fermi level indicates the occupied  $e_g$  states of two among three Mn atoms nearby the oxygen vacant site. The above result again confirms the presence of mixed charge state of Mn atoms in the compound.
